# Supplementary material for: Doping-induced evolutions of PbWO4 mesocrystals and their optical properties
Source: Royal Society of Chemistry journal article supplement (doi:10.1039/c4ra05450d), 2014-01-01
Supplement: c4ra05450d1.pdf [file c4ra05450d1.pdf]

**Electronic Supplementary Information**

**Doping-Induced Evolutions of PbWO<sub>4</sub> Mesocrystals in  
Morphology and Optical Properties**

*Ying Xiong,<sup>\*a,b</sup> Bing Wang,<sup>a</sup> Hao Zhuang,<sup>b</sup> Xin Jiang,<sup>b</sup> Guohua Ma,<sup>c</sup> Yong Yi,<sup>a</sup>*

*Wenyuan Hu,<sup>a</sup> Yuanlin Zhou<sup>a</sup>*

*<sup>a</sup> State Key Laboratory Cultivation Base for Nonmetal Composites and Functional  
Materials, Southwest University of Science & Technology, Mianyang 621010, P. R.*

*China*

*<sup>b</sup> Institute of Materials Engineering, University of Siegen, Paul-Bonatz-Str. 9-11,  
57076 Siegen, Germany*

*<sup>c</sup> Analytical and Testing Center, Southwest University of Science & Technology,  
Mianyang 621010, P. R. China*

## EXPERIMENTAL SECTION

**Materials:** All chemicals were of analytical grade and were used as received without further purification. Deionized water was used throughout. Sodium tungstate dehydrate ( $\text{Na}_2\text{WO}_4 \cdot \text{H}_2\text{O}$ ), lead acetate trihydrate ( $\text{Pb}(\text{NO}_3)_2 \cdot 3\text{H}_2\text{O}$ ), yttrium nitrate hexahydrate ( $\text{Y}(\text{NO}_3)_3 \cdot 6\text{H}_2\text{O}$ ) and ethylene glycol were all supplied by Sinopharm Chemical Reagent Company.

**Preparation of Y-doped  $\text{PbWO}_4$  Mesocrystals:** In a typical procedure,  $x$  mmol of yttrium nitrate hexahydrate and  $5-x$  mmol of lead acetate trihydrate were dissolved in a mixed solvent with 70 ml ethylene glycol (EG) and 30 ml distilled water to form solution **A**. Meanwhile, solution **B** was obtained by dissolving 5 mmol of sodium tungstate dehydrate in the same EG-water mixture with a total volume of 100 mL. Afterwards, solution **B** was slowly added into the solution **A** to obtain milky precipitation at room temperature. After continuous stirring for 1 hour, the as-obtained milky precipitation was kept at a constant temperature ( $25 \pm 2^\circ\text{C}$ ) in order to naturally settle on the bottom of beaker. Then, as-prepared samples were washed twice using the same EG-water mixed solvent, and further cleaned three times with water and absolute alcohol respectively, and finally dried in a vacuum at  $60^\circ\text{C}$  for 4 hours.

**Characterization:** X-ray powder diffraction (XRD) patterns of as-synthesized samples were performed using a Rigaku D/max-RB diffractometer with  $\text{Cu K}\alpha$  radiation ( $\lambda = 1.5406\text{\AA}$ ). Morphology of the products was acquired on a JEOL-6300F and Zeiss-Ultra 55 field-emission scanning electron microscopy (FE-SEM). High-resolution transmission electron microscopy (HRTEM) images and selective area electron diffraction (SAED) were recorded with a JEOL-2010 and Zeiss Liber 200 transmission electron microscopy. The atomic ratios of  $\text{Pb}^{2+}$  and  $\text{Y}^{3+}$  ions of as-prepared samples were recorded by X-ray fluorescence (XRF, Axios) and the ratio of each sample was the average value after three measurements. Raman spectra were carried out on a LABRAM-HR Confocal Laser Micro-Raman spectrometer using an  $\text{Ar}^+$  laser with 514.5 nm at room temperature. UV-Vis diffuse reflection spectra of samples were obtained from Shimadzu UV-3150. Photoluminescence of as-obtained

samples were recorded on a Fluorolog-3 Jobin Yvon spectrophotometer using a Xe lamp as the excitation source at room temperature.

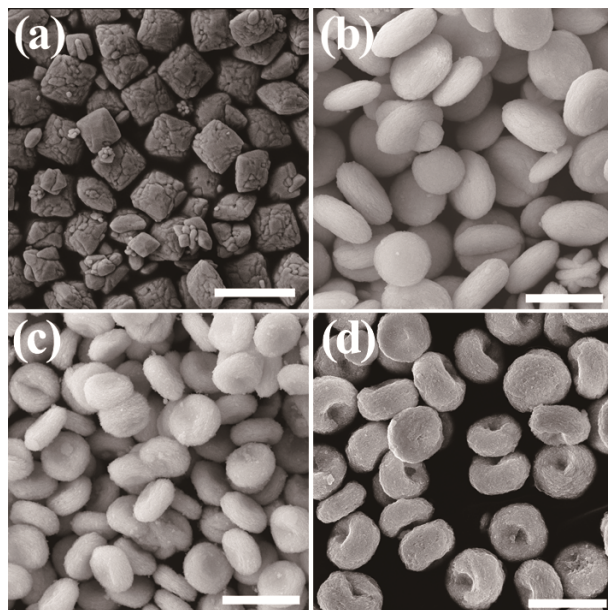

Fig. S1 Overview FESEM images of  $\text{Y}^{3+}$ -doped  $\text{PbWO}_4$  mesocrystals with different  $\text{Y}^{3+}$  doping concentrations. (a) 0 mol%, (b) 5 mol%, (c) 10 mol%, (d) 15 mol%. The scale bar in all images corresponds to 2  $\mu\text{m}$ .

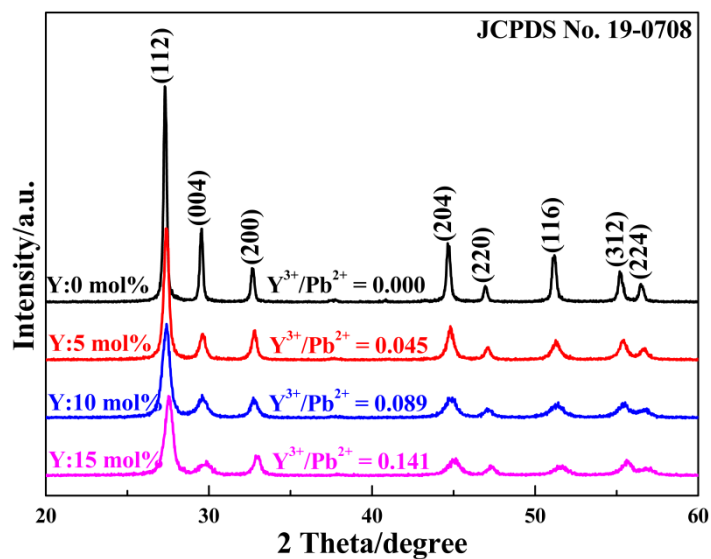

Fig. S2 Power X-ray diffraction (XRD) patterns of Y-doped  $\text{PbWO}_4$  mesocrystals with different  $\text{Y}^{3+}$  doping amounts. The atomic ratios of  $\text{Y}^{3+}$  to  $\text{Pb}^{2+}$  were average values after three XRF measurements.

Table S1. Various parameters such as peak position and calculated coherent length of  $D_{hkl}$  of XRD peaks of Y-doped  $\text{PbWO}_4$  mesocrystals shown in Figure 1.

| Samples | (112)   |                | (004)   |                | (200)   |                |
|---------|---------|----------------|---------|----------------|---------|----------------|
|         | 2 Theta | $D_{112}$ (nm) | 2 Theta | $D_{004}$ (nm) | 2 Theta | $D_{200}$ (nm) |
| Y-0     | 27.31   | 36.1           | 29.54   | 36.3           | 32.68   | 31.5           |
| Y-5     | 27.39   | 21.4           | 29.57   | 20.2           | 32.72   | 24.4           |
| Y-10    | 27.41   | 15.3           | 29.62   | 12.7           | 32.81   | 17.9           |
| Y-15    | 27.55   | 12.6           | 29.83   | 11.5           | 32.95   | 16.4           |

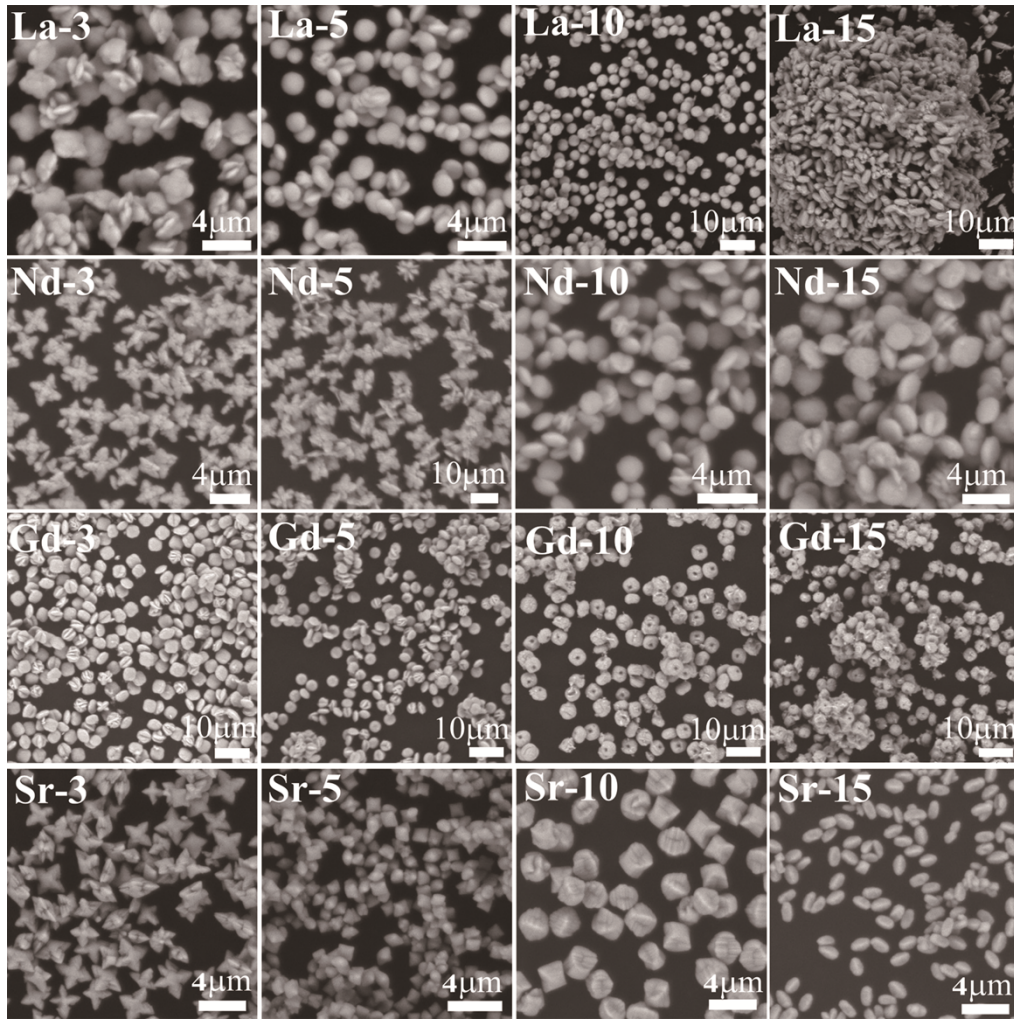

Fig. S3. Low-magnification TEM images of  $\text{PbWO}_4$  mesocrystals doped with trivalent rare-earth ions and divalent alkaline-earth ions.

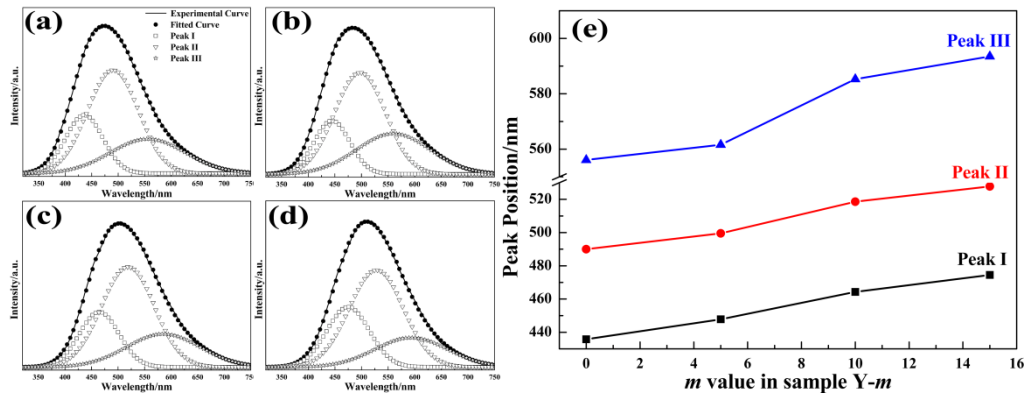

Fig. S4 Three fitted Gaussian emission curves (a-d) of Y-doped PbWO<sub>4</sub> mesocrystals with different Y<sup>3+</sup> concentrations: (a) 0 mol%, (b) 5 mol%, (c) 10 mol%, (d) 15 mol%. (e) the position of three fitted emission peaks as a function of Y<sup>3+</sup> concentrations.
